# Supplementary material
Source: PubMed Central journal article supplement (PMC5572214)
Supplement: NIHMS893854-supplement-supplement_1.pdf [file NIHMS893854-supplement-supplement_1.pdf]

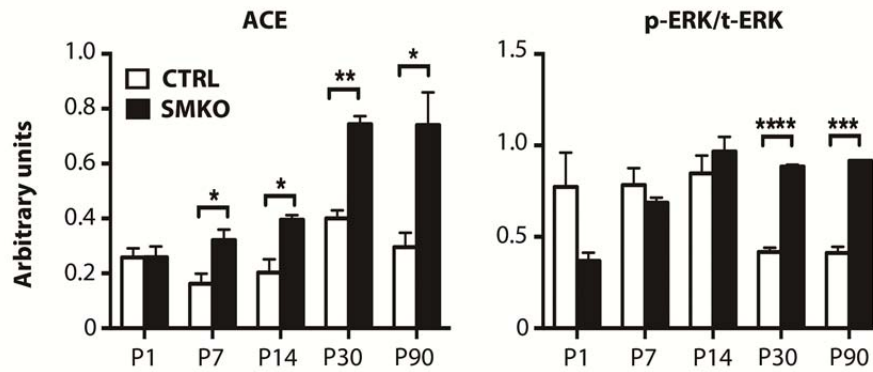

**Fig. S1. ACE abundance and ERK phosphorylation in *Fbln4*<sup>SMKO</sup> aortas after P7.** Fig. 1A was performed three times with different pools of animals. The numbers of animals used per genotype in each experiment are: pooled P1, n=5-12; P7, n=5-15; P14, n=5-12; P30, n=3-7; P90, n=2-6. Quantification of proteins normalized to GAPDH is shown for ACE. Bars are means  $\pm$  SEM. \* $P < 0.05$ , \*\* $P < 0.01$ , \*\*\* $P < 0.001$ , \*\*\*\* $P < 0.0001$ , unpaired  $t$ -test.

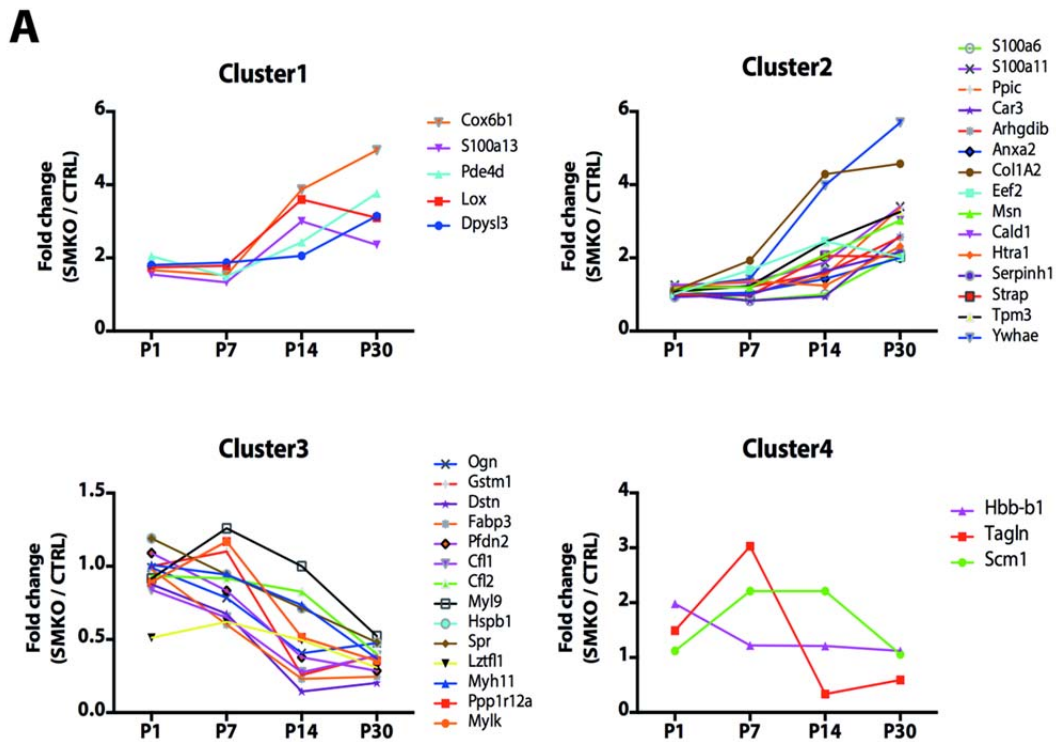

**B**

|   | Function                               | Score | Number | P-value  | Protein Symbol                                                                                   |
|---|----------------------------------------|-------|--------|----------|--------------------------------------------------------------------------------------------------|
| 1 | Actin cytoskeleton                     | 6.58  | 14     | 2.80E-07 | Cald1, Cfl1, Cfl2, Dstn, Msn, Myh11, Mylk, Tpm3<br>Anxa2, Arhgdib, Pde4d, Tagln, Ppp1r12a, Ywhae |
| 2 | ECM organization                       | 3.02  | 7      | 8.20E-04 | Col1a2, Serpinh1, Lox, Anxa2, Ctgf, Myh11, Ogn                                                   |
| 3 | Calcium ion binding                    | 1.82  | 6      | 1.40E-02 | S100a13, S100a6, S100a11, Mylk, Myl9                                                             |
| 4 | Metabolic process and oxidase activity | 0.81  | 6      | 6.80E-02 | Car3, Hbb-b1, Spr, Fabp3, Cox6b1, Lox                                                            |
| 5 | TGFβR signaling                        | 0.49  | 2      | 3.00E-01 | Htra1, Strap                                                                                     |

**Fig. S2. Ontology analysis and proteins that showed changes in abundance during aneurysm development.** (A) The line graphs showing the fold-expression of proteins (SMKO/CTRL) in each cluster identified by proteomics screening (also see Fig. 1D). (B) Classification of identified proteins according to their biological functions using DAVID tools. Substantial numbers of genes are involved in actin cytoskeleton organization.

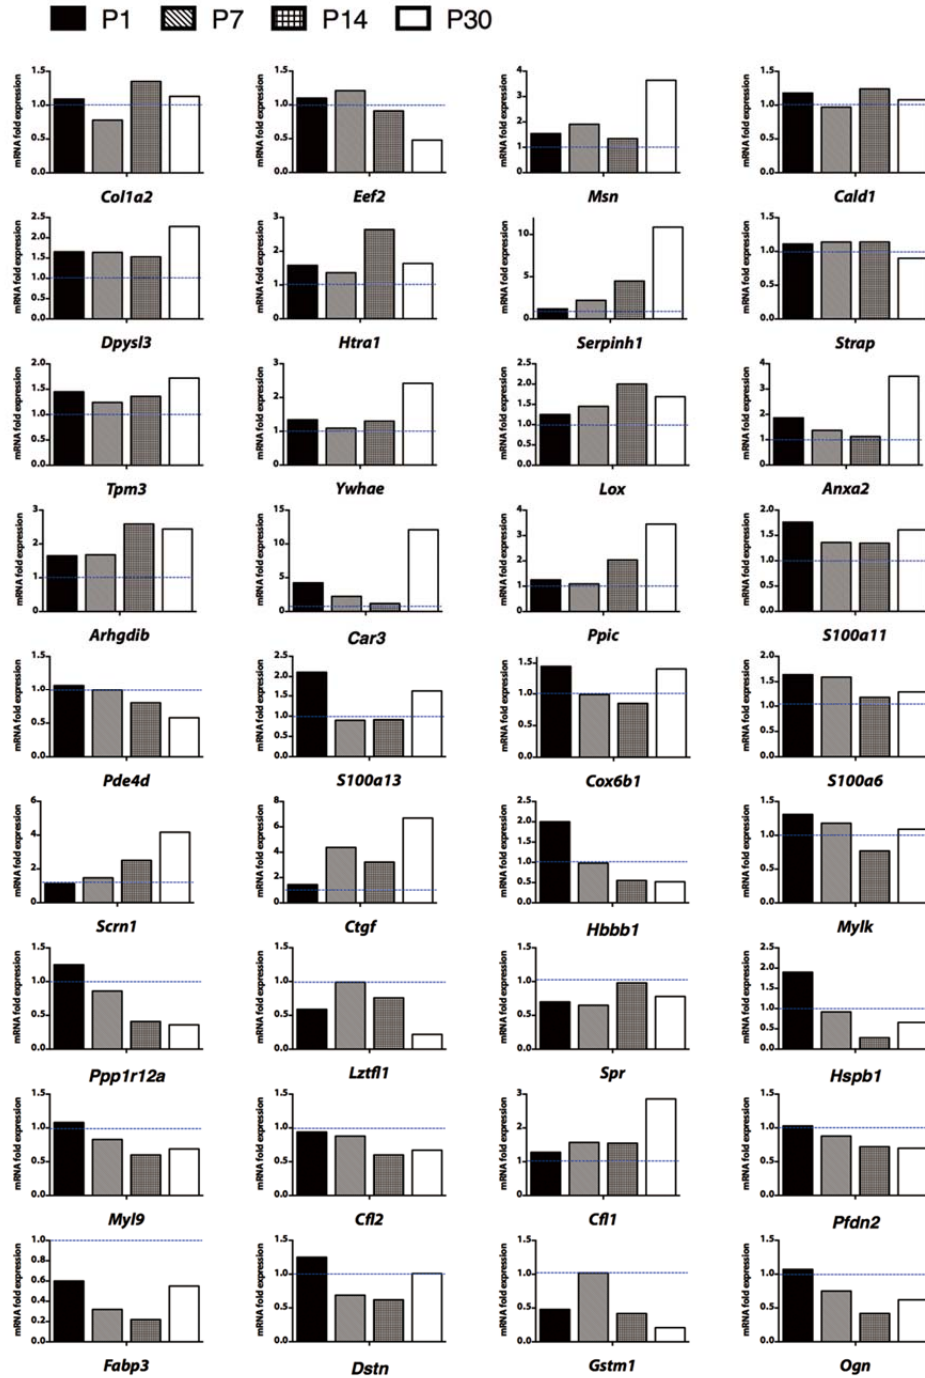

**Fig. S3. qPCR analysis of genes encoding the proteins identified by 2D-DIGE.**

mRNA were isolated from pooled ascending aortas from CTRL mice (P1, n=12, P7, n=18; P14, n=9; P30, n=12) and SMKO mice (P1, n=12; P7, n=18; P14, n=8; P30, n=11). Blue dotted line shows 1.0 fold expression (SMKO/CTRL).

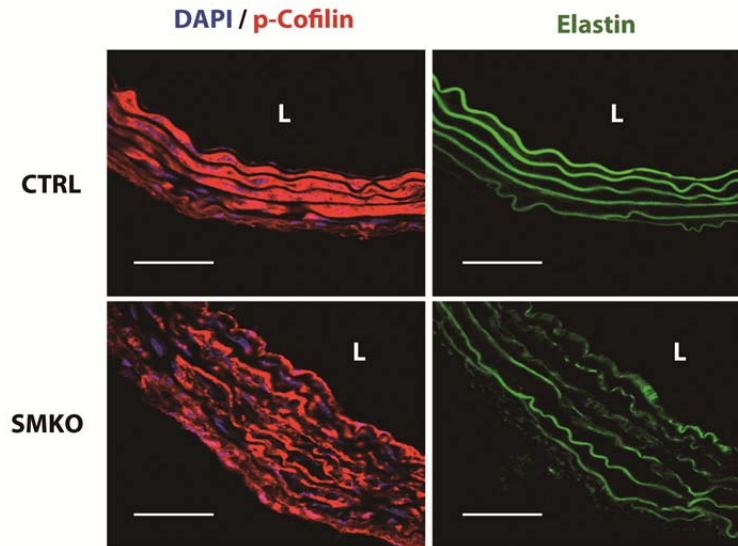

**Fig. S4. Phosphorylation of cofilin in *Fbln4*<sup>SMKO</sup> descending aortas.**

Cross sections of the descending aorta from CTRL and SMKO mice (n=3 mice per genotype) at P30 immunostained with phosphorylated (p)-cofilin (red) and DAPI (blue). Elastic lamellae are green (autofluorescence). Bars are 50  $\mu$ m. L: lumen.

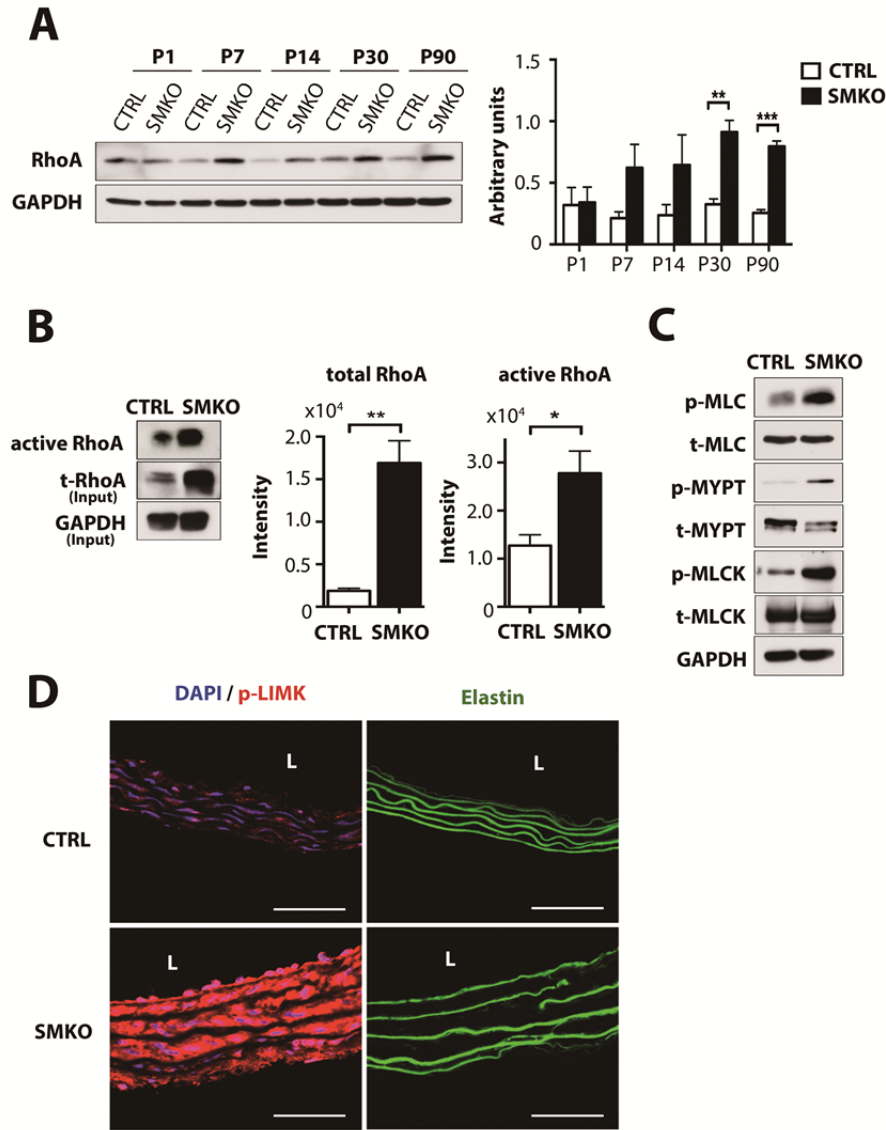

**Fig. S5. Activated RhoA signaling in *Fbln4*<sup>SMKO</sup> ascending aortas.** (A) Representative Western blots showing RhoA abundance in ascending aortas from CTRL and SMKO at the indicated post-developmental time points. The experiments were performed three times with different pools of animals with similar results. N values as in fig. S1. Quantification of proteins, normalized to GAPDH is shown in the graphs. Bars are means  $\pm$  SEM. \*\* $P < 0.01$ , \*\*\*  $P < 0.001$ , unpaired  $t$ -test. (B) RhoA activation assays using aortas at P30 ( $n=3$  mice per genotype). Quantification is shown in the graphs (right). Bars are means  $\pm$  SEM. \* $P < 0.05$ , \*\* $P < 0.01$ ,

unpaired *t*-test. **(C)** Phosphorylated MLC, MLCK, and MYPT are increased in SMKO ascending aortas at P30 (n=3 mice per genotype). **(D)** Cross sections of the ascending aorta from CTRL and SMKO mice at P30 immunostained with p-LIMK (red) and DAPI (blue). Elastic lamellae are green (autofluorescence). Images are representative of 3 mice per genotype. Bars are 50  $\mu$ m. L: lumen.

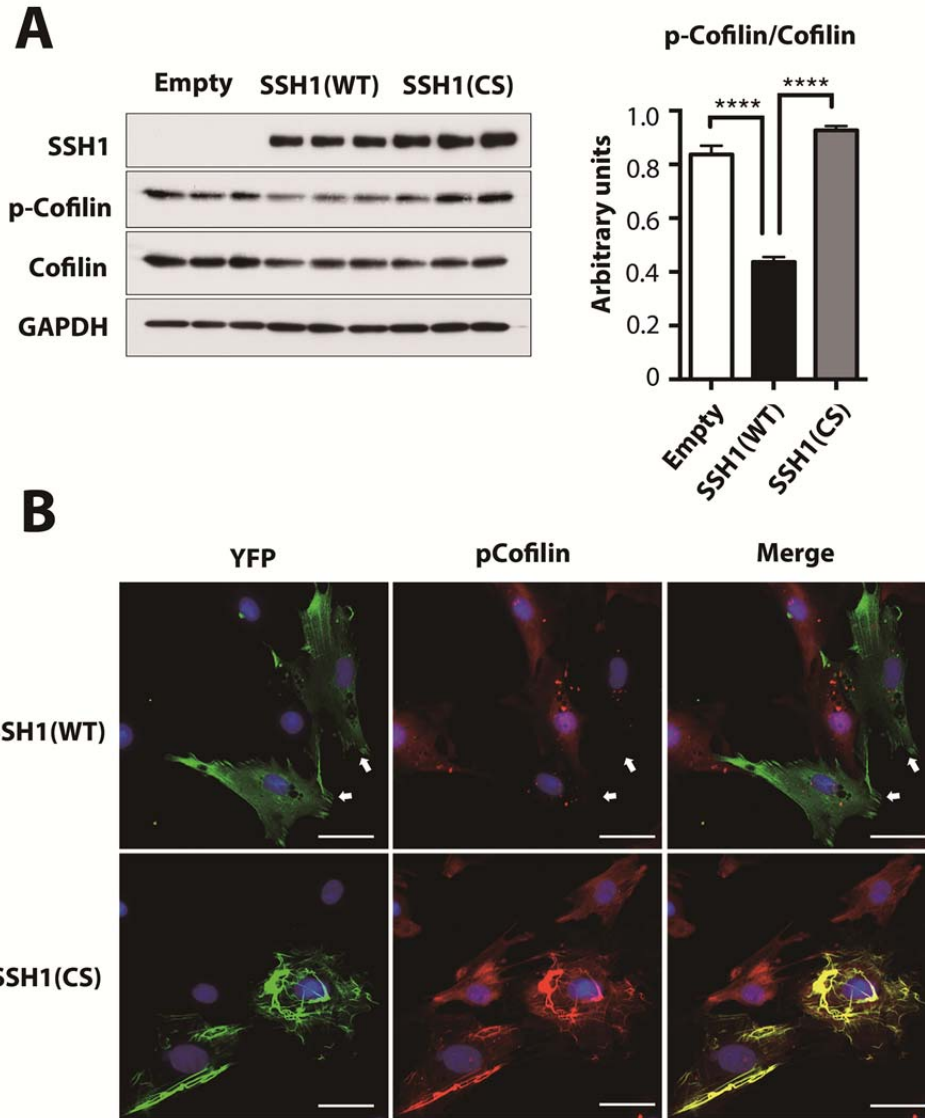

**Fig. S6. Dephosphorylation of cofilin by SSH1 in rat vascular SMCs.** (A) Western blots showing SSH1, phosphorylated (p)-cofilin and total cofilin abundance in extracts of cells transfected with empty vector (Empty), SSH1 (WT) or SSH1 (CS mutant).  $n=3$  independent experiments. \*\*\*\* $P < 0.0001$ , one-way ANOVA. (B) Immunostaining with DAPI (blue), YFP (SSH1 or SSH1CS mutant) and p-cofilin (red). Arrows indicate YFP positive SSH1-expressing cells with absence of p-cofilin (upper panel). Bars are 40  $\mu$ m.  $n=3$  independent experiments.

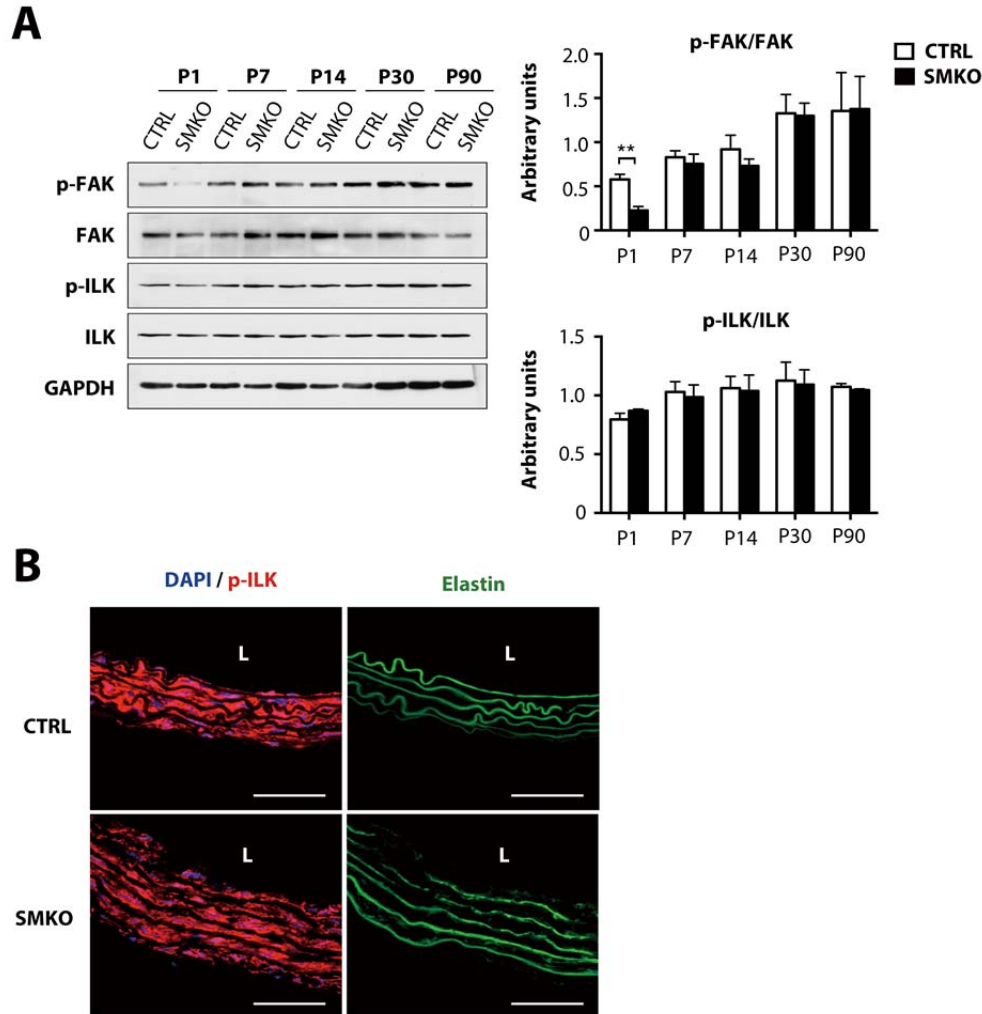

**Fig. S7. Phosphorylation of FAK and ILK in ascending aortas.** (A) Representative Western blots showing p-FAK, FAK, p-ILK and ILK amounts in ascending aortas from CTRL and SMKO mice at the indicated post-developmental time points. The experiment was repeated three times with different sets of animals with similar results. Quantification of proteins, normalized to GAPDH is shown in the graphs. N values as in fig. S1. Bars are means  $\pm$  SEM.  $**P < 0.01$ , unpaired *t*-test. (B) Representative images of cross sections of the P30 ascending aorta from CTRL (n=4) and SMKO (n=5) mice immunostained with p-ILK (red) and DAPI (blue). Elastic lamellae are green (autofluorescence). Bars are 50  $\mu$ m.



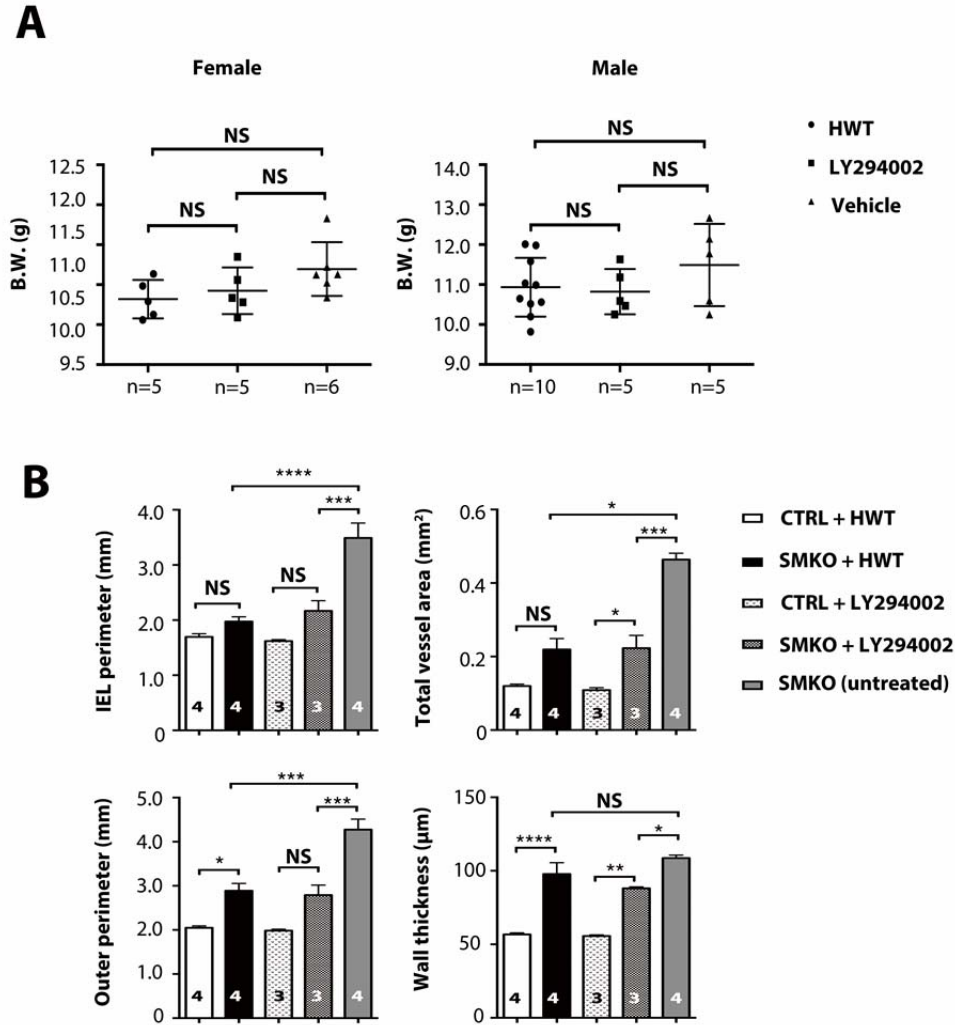

**Fig. S8. The effects of PI3K inhibitors on general growth and aneurysm development. (A)**

Comparison of body weight (B.W.) between vehicle-, Wortmannin (HWT)-, or LY294002-treated SMKO at P30. Each point indicates a different animal. NS, not significant, one-way ANOVA. **(B)** Morphometric analysis of cross sections of the ascending aorta from HWT-treated CTRL, SMKO, LY294002-treated CTRL, SMKO and untreated SMKO. IEL perimeter, outer

perimeter, total vessel area and wall thickness are shown. Bars are means  $\pm$  SEM. \* $P < 0.05$ , \*\* $P < 0.01$ , \*\*\* $P < 0.001$ , \*\*\*\* $P < 0.0001$ . Kruskal-Wallis tests. Number of animals is indicated on each bar.

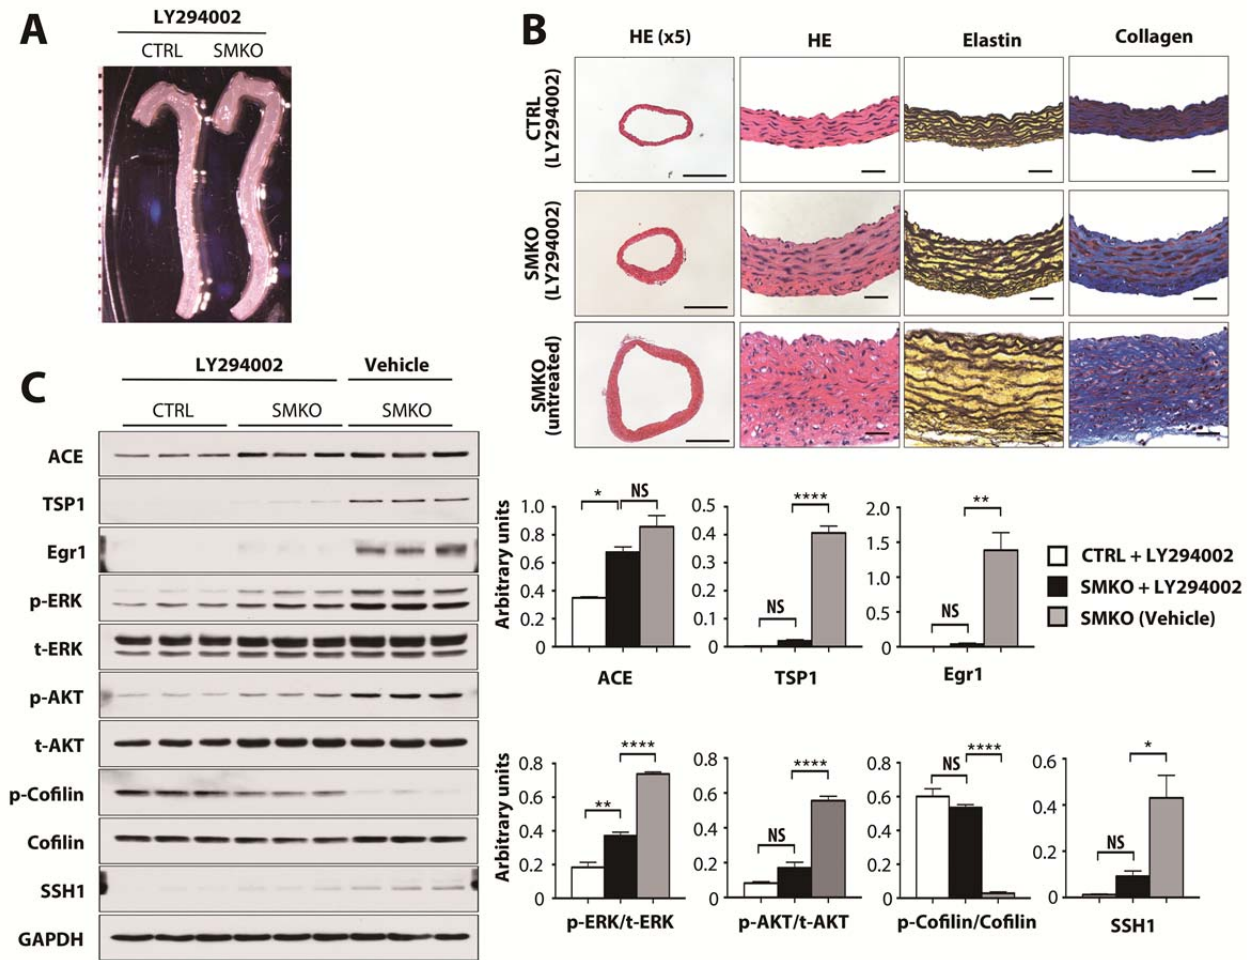

**Fig. S9. The effect of LY294002 on aneurysm development in *Fbln4*<sup>SMKO</sup> mice.** (A) Gross photos of CTRL and SMKO aortas treated with LY294002. Images are representative of 10 mice per genotype. (B) Histological images of cross sections of ascending aortas from LY294002-treated CTRL, SMKO and untreated-SMKO mice (n=3 per genotype) stained with hematoxylin and eosin (HE), Hart's (elastin) and Masson-Trichrome (collagen). Scale bars are 500  $\mu$ m (x5) and 20  $\mu$ m. (C) The effect of LY294002 treatment from P7 to P30 in SMKO aortas, analyzed immunoblotting with antibodies as indicated. N=6 per genotype and treatment. Quantification of proteins, normalized to GAPDH is shown in the graph. Bars are means  $\pm$  SEM. \* $P < 0.05$ , \*\*  $P < 0.01$ , \*\*\*\* $P < 0.0001$ , one-way ANOVA.

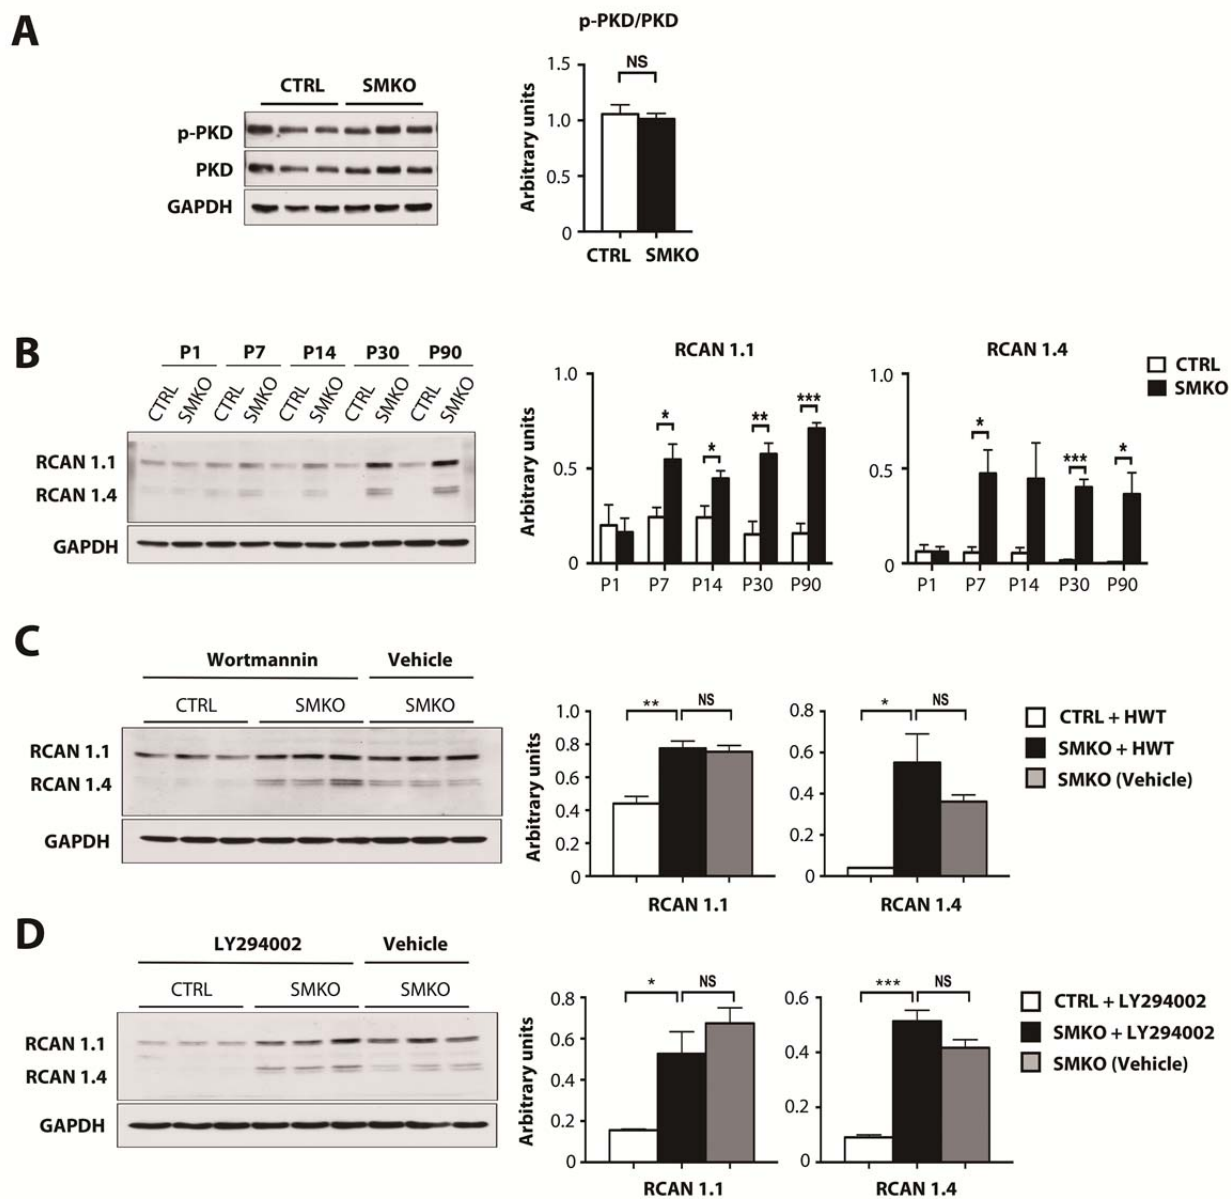

**Fig. S10. Evaluation of PKD phosphorylation and calcineurin activity in ascending aortas.**

(A) PKD phosphorylation is unchanged between CTRL and SMKO mice at P30. N values as in fig. S5C. Unpaired *t*-test. (B-D) Western blots showing calcineurin activity (as assessed by the abundance of the inhibitor RCAN1.4) in the aortas from P1 to P90 in CTRL and SMKO mice (B) and after treatment with Wortmannin (HWT; C) or LY294002 (D). N values as in fig. S1 (B), Fig. 6C (C), and fig. S9C (D). Quantification of proteins, normalized to GAPDH is shown in the

graphs. Bars are means  $\pm$  SEM. \*P < 0.05, \*\*P < 0.01, \*\*\*P < 0.001, unpaired *t*-test (B), one-way ANOVA (C, D).

Table S1. Antibodies used in this study.

Western blot analysis

| Antibody              | Dilution | Source                         | Catalog Number |
|-----------------------|----------|--------------------------------|----------------|
| GAPDH                 | 1:3000   | Cell Signaling                 | #2118L         |
| ACE                   | 1:1000   | Santa Cruz Biotechnology       | sc-20791       |
| p-MEK1/2              | 1:500    | Cell Signaling                 | #9154          |
| p-ERK1/2              | 1:500    | Cell Signaling                 | #4376S         |
| t-ERK                 | 1:1000   | Cell Signaling                 | #9102S         |
| p-Cofilin (Ser3)      | 1:500    | Cell Signaling                 | #3313S         |
| t-Cofilin             | 1:1000   | Cell Signaling                 | #5175S         |
| SSH1                  | 1:500    | ECM Biosciences                | #SP1711        |
| SSH1                  | 1:500    | Gifted from Dr. Kensaku Mizuno |                |
| SSH2                  | 1:500    | Santa Cruz Biotechnology       | sc-160843      |
| SSH3                  | 1:500    | Santa Cruz Biotechnology       | sc-390058      |
| PKD                   | 1:1000   | Cell Signaling                 | #2052P         |
| p-PKD(Ser744/748)     | 1:500    | Cell Signaling                 | #2054P         |
| CIN                   | 1:1000   | Cell Signaling                 | #4686S         |
| RhoA                  | 1:1000   | Cell Signaling                 | #2117S         |
| p-MLC 2 (Thr18/Ser19) | 1:500    | Cell Signaling                 | #3674S         |
| p-MYPT 1 (Thr696)     | 1:500    | Cell Signaling                 | #5163P         |
| p-MLCK                | 1:500    | Life technologies              | 44-1085G       |
| MLCK                  | 1:1000   | Sigma                          | M7905          |
| p-FAK (Y397)          | 1:500    | Cell Signaling                 | #8556P         |
| t-FAK                 | 1:1000   | Cell Signaling                 | #3285P         |
| ILK                   | 1:1000   | Gifted from Dr. Chuanyue Wu    |                |
| p-ILK (Ser246)        | 1:500    | Millipore                      | #AB1076        |
| TSP1                  | 1:1000   | NeoMarkers                     | MS-421-P1      |
| Egr1                  | 1:500    | Cell Signaling                 | #4154S         |
| p-Akt (Thr308)        | 1:500    | Cell Signaling                 | #4056S         |
| Akt                   | 1:1000   | Cell Signaling                 | #9272S         |
| MLC2                  | 1:1000   | Cell Signaling                 | #3672S         |

## Immunostaining

| <b>Antibody</b>      | <b>Dilution</b> | <b>Source</b>            | <b>Catalog Number</b> |
|----------------------|-----------------|--------------------------|-----------------------|
| p-Cofilin 1 (hSer3)  | 1:200           | Santa Cruz Biotechnology | sc-12912              |
| Rhodamine Phalloidin | 1:500           | Cytoskeleton             | #PHDR1                |
| p-ILK (Ser246)       | 1:200           | Millipore                | #AB1076               |
| p-LIMK1/2            | 1:200           | Santa Cruz Biotechnology | sc-28409-R            |

Table S2. QPCR primer sequences

| Gene              | Forward primer 5' -3'  | Reverse primer 5' -3'      |
|-------------------|------------------------|----------------------------|
| For all qPCR data |                        |                            |
| B2m               | ccgagcccaagaccgtcta    | aactggatttgaattaagcaggttca |
| Gapdh             | tgacgtgccgcctggagaaa   | agtgtagcccaagatgccctcag    |
| Fig. 1B           |                        |                            |
| Acta2             | atcgtccaccgcaaatgc     | aaggaaactggaggcgctg        |
| Cnn1              | aactcatggatggcctcaaa   | accggctgcagcttg            |
| Myh11             | tcaacccaaccgcaggaagctg | tgctaagcagctgctgggct       |
| Sm22              | gcgctgggcttcca         | caggctgtcacaatttctg        |
| Myocd             | cacccacgacatcaaatcc    | tgcatcattctgtcacttctga     |
| Srf               | gtctccctctcgtgacagcag  | cagttgtgggtacagacagcgt     |
| Fig. 5B           |                        |                            |
| Fbln4             | gcactccgggatgtca       | gcatttcctcacccttgca        |
| Fig. S3           |                        |                            |
| Colla1            | gagcggagagtactggatcg   | gctcttttctctggggttc        |
| Eef2              | gtggtggactgtgtgtctgg   | cgctggaaggtctgtagag        |
| Msn               | gataagttgcttcccaagagt  | ctcatagatgtgagaccaagg      |
| Cald1             | agagccttaacatttccaatcc | tgcagcttagtgcttttcttc      |
| Dpysl3            | tgcttacaagggaatgacc    | ggctctgacctcctgcttg        |
| Htra1             | ttggaagcccttttctctt    | atggaattcgaaggagatg        |
| Serpinh1          | aagggagacaagatgcgaga   | tctggctccatgtcctaac        |
| Strap             | tcagtctgatgggaactc     | tctgaaaaccgatctttgg        |
| Tpm3              | ggcctcatgcatgttagtt    | gagggcgatgagatgatgtt       |
| Ywhae             | gtgattggagccagaagac    | cctgtgtagtccccttca         |
| Lox               | tgccaacacacagaggagag   | ccaggtagctggggtttaca       |
| Anxa2             | caccaacttcgatgctgaga   | caaaatcaccgtctccaggt       |
| Arhgd12           | ggactggcatgagagtggat   | aggtgaggtgtcctctgttg       |
| Car3              | cttgatccctggacaaaat    | agctcacagtcatggctct        |
| Ppic              | tgattggcctcttggaac     | cctccagtgccatctctagc       |
| S100a11           | gcattgagtcctgattgct    | atctagctcccgtcacagt        |
| Pde4d             | gaaagccagcctgaaacttg   | tcctggcagatgacagtgag       |
| S100a13           | cttcccgtcaatctgtgt     | ctagagagcccacgtccttg       |

|          |                         |                       |
|----------|-------------------------|-----------------------|
| Cox6b1   | gcgtcttggctaagggtcac    | accactcacacacggagaca  |
| S100a6   | aagctgcaggatgctgaaat    | ctggattgaccgagagagg   |
| Scrn1    | gagtgacgaggagcaaggtc    | tagtcgggtgggaagtttg   |
| Ctgf     | caaagcagctcaaatacca     | ggccaaatgtgtctccagt   |
| Hbb-b1   | gctggtgtctaccctgga      | acgatcataftcccaggag   |
| Mylk     | atatccgaggaagagaggaagg  | acttcttctgccacctagcac |
| Ppp1r12a | ttcgtatgtcacccctaca     | ttggtgtgatgtggtgctt   |
| Lztf1    | gtttcacgtagggtctgcat    | cttcctggccttcaactgag  |
| Spr      | tagaggtgggaagagcagga    | ccagtgaacaccacaggatg  |
| Hspb1    | cctctccctatcccctgag     | caaaagagcgcacagattga  |
| Myl9     | atgaggaggtggacgagatg    | cacggggagggttagagtga  |
| Cfl2     | atacactcacctgccttgg     | catcgggaaccaaaagacat  |
| Cfl1     | cgcaagtctcaaccacaga     | ttgtctggcagcatcttgac  |
| Pfdn2    | ggagcggactgtcaaagaag    | cttctcatcttccccatga   |
| Fabp3    | catcgagaagaacggggata    | tgccatgagtgagatcagg   |
| Dstn     | cagtgcagacaaaaagtgcatag | actttcagaggtgctgttctg |
| Gstm1    | taggtctgctgctctggtt     | ctggtgctgtggtcttctca  |
| Ogn      | cctggaatctgtgcctccta    | agctgcactgatggggttag  |



Table S3. List of links to raw data for mass spectrometry.

| File name                            | Spot # | Protein                                             | Accession no. |
|--------------------------------------|--------|-----------------------------------------------------|---------------|
| PRJ11-OTV1_C00072_spot1.raw          | 1      | Collagen 1 alpha-2 chain                            | NP_031769     |
| PRJ12-QEX1_C00096_120413164131.raw   | 2      | Elongation factor 2                                 | NP_031933     |
| PRJ17-QEX1_C00178.raw                | 3      | Moesin                                              | NP_034963     |
|                                      |        | Caldesmon-1                                         | NP_663550     |
| PRJ12-QEX1_C00103_120414045615.raw   | 4      | Dihydropyrimidinase-like 3                          | NP_001129558  |
| PRJ17-QEX1_C00180.raw                | 5      | Serine protease HTRA1                               | NP_062510     |
| PRJ11-OTV1_C00073_spot7.raw          | 6      | Serpin H1                                           | NP_001104514  |
| PRJ17-QEX1_C00183.raw                | 7      | Serine-threonine kinase receptor-associated protein | NP_035629     |
| PRJ21-QEX1_C00282.raw                | 8      | Tropomyosin 3                                       | NP_071709     |
| PRJ18-QEX1_C00190_Spot12.raw         | 9      | 14-3-3 protein epsilon                              | NP_033562     |
| PRJ21-QEX1_C00284.raw                | 10     | Protein-lysine6-oxidase                             | NP_034858     |
| PRJ21-QEX1_C00290.raw                | 11     | Annexin A2                                          | NP_031611     |
| PRJ11-OTV1_C00075_spot15.raw         | 12     | Rho dissociation inhibitor 2                        | NP_031512     |
| PRJ11-OTV1_C00076_spot16.raw         | 13     | Carbonic anhydrase 3                                | NP_031632     |
| PRJ8-OTV1_C00049_17_120320080634.raw | 14     | Peptidyl-prolyl cis-trans isomerase C               | NP_032934     |
| PRJ17-QEX1_C00174.raw                | 15     | Protein S100-A11                                    | NP_058020     |
| PRJ17-QEX1_C00175.raw                | 16     | Phosphodiesterase 4D, cAMP-specific (Fragment)      | NP_035186     |
| PRJ8-OTV1_C00051_20.raw              | 17     | Protein S100-A13                                    | NP_033139     |
| PRJ8-OTV1_C00051_22.raw              | 18     | Cytochrome c oxidase subunit 6B1                    | NP_079904     |
| PRJ8-OTV1_C00051_23.raw              | 19     | Protein S100-A6                                     | NP_035443     |
| PRJ18-QEX1_C00194_spot60.raw         | 20     | Secernin-1                                          | NP_081544     |
| PRJ11-OTV1_C00080_spot31.raw         | 21     | Connective tissue growth factor                     | NP_034347     |
| PRJ14-QEX1_C00137_spot54B.raw        | 22     | Transgelin (SM-22)                                  | NP_035656     |
| PRJ21-QEX1_C00291.raw                | 23     | Hemoglobin subunit beta-1                           | NP_032246     |
| PRJ12-QEX1_C00097_120413182628.raw   | 24     | Myosin, light polypeptide kinase                    | NP_647461     |
|                                      |        | Protein phosphatase 1 regulatory subunit 12A        | NP_082168     |
| PRJ12-QEX1_C00098_120413201126.raw   | 25     | Myh11 protein                                       | NP_038635     |
| PRJ11-OTV1_C00080_spot31.raw         | 26     | Leucine zipper transcription factor-like 1          | NP_201579     |
| PRJ12-QEX1_C00099_120413215624.raw   | 27     | Sepiapterin reductase                               | NP_035597     |
|                                      |        | Heat shock protein beta-1                           | NP_038588     |
| PRJ12-QEX1_C00100_120413234123.raw   | 28     | Myosin regulatory light polypeptide 9               | NP_742116     |
| PRJ14-QEX1_C00130_spot36.raw         | 29     | Cofilin-2                                           | NP_031714     |

|                                                                                                                                                                                                                       |           |                                   |           |
|-----------------------------------------------------------------------------------------------------------------------------------------------------------------------------------------------------------------------|-----------|-----------------------------------|-----------|
| <b>PRJ14-QEX1_C00131_spot37.raw</b>                                                                                                                                                                                   | <b>30</b> | Cofilin-1                         | NP_031713 |
| <b>PRJ14-QEX1_C00132_spot38.raw</b>                                                                                                                                                                                   | <b>31</b> | Prefoldin subunit 2               | NP_035200 |
| <b>PRJ17-QEX1_C00179.raw</b>                                                                                                                                                                                          | <b>32</b> | Fatty acid-binding protein, heart | NP_034304 |
| <b>PRJ8-OTV1_C00051_41.raw</b>                                                                                                                                                                                        | <b>33</b> | Dextrin                           | NP_062745 |
| <b>PRJ8-OTV1_C00051_42.raw</b>                                                                                                                                                                                        | <b>34</b> | Glutathione S-transferase Mu      | NP_034488 |
| <b>PRJ11-OTV1_C00077_spot44.raw</b>                                                                                                                                                                                   | <b>35</b> | Mimecan (Osteoglycin)             | NP_032786 |
| <b>MassIVE ID: MSV000079171 <a href="http://massive.ucsd.edu/ProteoSAFe/status.jsp?task=53d969d6ef0840c69e30261ee6220238">http://massive.ucsd.edu/ProteoSAFe/status.jsp?task=53d969d6ef0840c69e30261ee6220238</a></b> |           |                                   |           |
